# Supplementary material for: Shape memory assisted self healing (SMASH) polymeric and composite systems
Source: MDPI journal article supplement (doi:10.3390/genes14030660), 2012-01-01
Supplement: s1 [file s1]

**Supplementary Table S1.** SNPs associated with athlete status in the Turkish cohorts of endurance athletes, power athletes and controls.

| Gene             | Locus<br>(CRCh38.p14) | Polymorphism | REF<br>allele | ALT<br>allele | Endurance vs<br>sprint/power<br><i>p</i> value | Endurance vs<br>controls<br><i>p</i> value | Sprint/power<br>vs<br>controls<br><i>p</i> value | Allelic<br>frequencies in<br>sprint/power<br>athletes | Allelic<br>frequencies in<br>controls | Allelic<br>frequencies in<br>endurance<br>athletes |
|------------------|-----------------------|--------------|---------------|---------------|------------------------------------------------|--------------------------------------------|--------------------------------------------------|-------------------------------------------------------|---------------------------------------|----------------------------------------------------|
| <i>ACVR2A</i>    | chr2_147926350        | rs12620026   | A             | T             | 0.038                                          | 0.048                                      | 0.919                                            | A (38%)<br>T (62%)                                    | A (62%)<br>T (38%)                    | A (84%)<br>T (16%)                                 |
| <i>ANKRD20A1</i> | chr9_67901030         | rs62542472   | C             | T             | 0.017                                          | 0.488                                      | 0.002                                            | C (98%)<br>T (2%)                                     | C (55%)<br>T (45%)                    | C (50%)<br>T (50%)                                 |
| <i>ANKRD36</i>   | chr2_97164236         | rs200092139  | G             | A             | 0.028                                          | 0.285                                      | 0.001                                            | G (100%)                                              | G (52%)<br>A (48%)                    | G (55%)<br>A (45%)                                 |
|                  | chr2_97163407         | rs62153885   | T             | G             | 0.026                                          | 0.450                                      | 0.139                                            | T (98%)<br>G (2%)                                     | T (100%)                              | T (53%)<br>G (47%)                                 |
|                  | chr2_97164279         | rs201424946  | G             | T             | 0.023                                          | 0.441                                      | 0.002                                            | G (100%)                                              | G (58%)<br>T (42%)                    | G (53%)<br>T (47%)                                 |
|                  | chr2_97142481         | rs79070930   | A             | G             | 0.023                                          | 0.498                                      | 0.105                                            | A(100%)                                               | A(98%)<br>G(2%)                       | A (53%)<br>G (47%)                                 |
|                  | chr2_97142492         | rs74969160   | G             | A             | 0.018                                          | 0.398                                      | 0.123                                            | G (100%)                                              | G (100%)                              | G (51%)<br>A (49%)                                 |
| <i>ANKRD36C</i>  | chr2_95954026         | rs77522461   | G             | A             | 0.018                                          | 0.371                                      | 0.001                                            | G (100%)                                              | G (53%)<br>A (47%)                    | G (51%)<br>A (49%)                                 |
|                  | chr2_95941237         | rs79451673   | T             | C             | 0.018                                          | 0.398                                      | 0.123                                            | T (100%)                                              | T (100%)                              | T (51%)<br>C (49%)                                 |
| <i>ARRDC4</i>    | chr15_97965441        | rs8031829    | C             | A             | 0.025                                          | 0.331                                      | 0.195                                            | C (66%)<br>A (34%)                                    | C (65%)<br>A (35%)                    | C (29%)<br>A (71%)                                 |
| <i>ATP1B2</i>    | chr17_7654516         | rs1642764    | C             | T             | 0.041                                          | 0.512                                      | 0.157                                            | C (64%)<br>T (36%)                                    | C (60%)<br>T (40%)                    | C (31%)<br>T (69%)                                 |
| <i>BZW1</i>      | chr2_200815208        | rs12475785   | G             | T             | 0.040                                          | 0.746                                      | 0.081                                            | G (69%)<br>T (31%)                                    | G (57%)<br>T (43%)                    | G (34%)<br>T (66%)                                 |
| <i>CNTN5</i>     | chr11_99819697        | rs7125822    | T             | G             | 0.018                                          | 0.496                                      | 0.002                                            | T (100%)                                              | T (57%)<br>G (43%)                    | T (51%)<br>G (49%)                                 |
| <i>CNTNAP3</i>   | chr9_39088492         | rs1758499    | T             | A             | 0.018                                          | 0.432                                      | 0.002                                            | T (100%)                                              | T (55%)<br>A (45%)                    | T (51%)<br>A (49%)                                 |
| <i>COL12A1</i>   | chr6_75134129         | rs1332778    | T             | C             | 0.037                                          | 0.286                                      | 0.296                                            | T (62%)<br>C (38%)                                    | T (67%)<br>C (33%)                    | T (29%)<br>C (71%)                                 |
| <i>FANK1</i>     | chr10_125896805       | rs5013165    | C             | T             | 0.028                                          | 0.335                                      | 0.002                                            | C (100%)                                              | C (55%)<br>T (45%)                    | C (55%)<br>T (45%)                                 |
|                  | chr10_125896794       | rs74162872   | G             | A             | 0.028                                          | 0.504                                      | 0.123                                            | G (100%)                                              | G (100%)                              | G (55%)<br>A (45%)                                 |

|                                         |                |              |   |   |       |       |       |                    |                    |                    |
|-----------------------------------------|----------------|--------------|---|---|-------|-------|-------|--------------------|--------------------|--------------------|
| <i>FBLN5</i>                            | chr14_91937316 | rs2474028    | T | C | 0.033 | 0.746 | 0.069 | T (70%)<br>C (30%) | T (58%)<br>C (42%) | T (34%)<br>C (66%) |
| <i>FOXD4L4</i>                          | chr9_65737152  | rs1212108435 | C | A | 0.028 | 0.504 | 0.123 | C (100%)           | C (100%)           | C (55%)<br>A (45%) |
| <i>FRG2C</i>                            | chr3_75665747  | rs62247159   | G | A | 0.023 | 0.450 | 0.123 | G (100%)           | G (100%)           | G (53%)<br>A (47%) |
| <i>HNRNPM</i>                           | chr19_8445260  | rs11881939   | T | C | 0.026 | 0.064 | 0.705 | T (41%)<br>C (59%) | T (75%)<br>C (25%) | T (93%)<br>C (7%)  |
| <i>INPP4B</i>                           | chr4_142081862 | rs1353603    | T | C | 0.042 | 0.344 | 0.268 | T (75%)<br>C (25%) | T (83%)<br>C (17%) | T (39%)<br>C (61%) |
| <i>KMT2C</i>                            | chr7_152230042 | rs62481502   | A | G | 0.042 | 0.198 | 0.450 | A (50%)<br>G (50%) | A (100%)           | A (100%)           |
| <i>KRT83</i>                            | chr12_52314457 | rs2852456    | G | A | 0.043 | 0.326 | 0.288 | G (70%)<br>A (30%) | G (77%)<br>A (23%) | G (36%)<br>A (64%) |
| <i>AGRN</i>                             | chr1_1067673   | rs4074992    | C | T | 0.037 | 0.847 | 0.057 | C (83%)<br>T (17%) | C (70%)<br>T (30%) | C (44%)<br>T (56%) |
| <i>MAPK9</i>                            | chr5_180238572 | rs4700729    | A | G | 0.039 | 0.710 | 0.089 | A (85%)<br>G (15%) | A (78%)<br>G (22%) | A (46%)<br>G (54%) |
| <i>MUC3A&amp;<br/>LOC10537543<br/>1</i> | chr7_100957146 | rs1378797034 | G | A | 0.028 | 0.285 | 0.001 | G (100%)           | G (52%)<br>A (48%) | G (55%)<br>A (45%) |
|                                         | chr7_100957183 | rs1420864111 | C | A | 0.028 | 0.285 | 0.001 | C (100%)           | C (53%)<br>A (47%) | C (55%)<br>A (45%) |
|                                         | chr7_100959537 | rs74318947   | A | T | 0.023 | 0.326 | 0.001 | A (100%)           | A (53%)<br>T (47%) | A (53%)<br>T (47%) |
|                                         | chr7_100960407 | rs73163759   | T | C | 0.023 | 0.326 | 0.001 | T (100%)           | T (53%)<br>C (47%) | T (53%)<br>C (47%) |
|                                         | chr7_100957015 | rs1194458035 | T | C | 0.018 | 0.372 | 0.001 | T (100%)           | T (52%)<br>C (48%) | T (51%)<br>C (49%) |
|                                         | chr7_100959517 | rs77153975   | A | G | 0.018 | 0.372 | 0.001 | A (100%)           | A (53%)<br>G (47%) | A (51%)<br>G (49%) |
|                                         | chr7_100957158 | rs1378797034 | T | C | 0.043 | 0.256 | 0.002 | T (100%)           | T (55%)<br>C (45%) | T (58%)<br>C (42%) |
|                                         | chr7_100956464 | rs1373570695 | T | G | 0.018 | 0.398 | 0.123 | T (100%)           | T(100%)            | T (51%)<br>G (49%) |
|                                         | chr7_100956873 | rs1024883687 | A | G | 0.018 | 0.398 | 0.123 | A (100%)           | A (100%)           | A (51%)<br>G (49%) |
|                                         | chr7_100957083 | rs1245494471 | C | T | 0.018 | 0.398 | 0.123 | C (100%)           | C (100%)           | C (51%)<br>T (49%) |
|                                         | chr7_100959437 | rs78538898   | T | C | 0.018 | 0.398 | 0.123 | T (100%)           | T (100%)           | T (51%)<br>C (49%) |
|                                         | chr7_100959563 | rs73714242   | C | T | 0.023 | 0.450 | 0.123 | C (100%)           | C (100%)           | C (53%)            |

|                             |                 |              |   |   |       |       |       |                    |                    |                    |
|-----------------------------|-----------------|--------------|---|---|-------|-------|-------|--------------------|--------------------|--------------------|
|                             |                 |              |   |   |       |       |       |                    |                    | T (47%)            |
|                             | chr7_100957117  | rs1223084315 | A | G | 0.043 | 0.621 | 0.123 | A (100%)           | A (100%)           | A (58%)<br>G (42%) |
| <i>MUC16</i>                | chr19_8851096   | rs2972591    | A | G | 0.030 | 0.390 | 0.181 | A (79%)<br>G (21%) | A (80%)<br>G (20%) | A (39%)<br>G (61%) |
| <i>MYO16</i>                | chr13_109124983 | rs157023     | G | T | 0.039 | 1.000 | 0.039 | G (74%)<br>T (26%) | G (55%)<br>T (45%) | G (37%)<br>T (63%) |
| <i>NOX5&amp;<br/>SPESP1</i> | chr15_68946106  | rs3743093    | G | A | 0.028 | 1.000 | 0.028 | G (72%)<br>A (28%) | G (50%)<br>A (50%) | G (34%)<br>A (66%) |
| <i>NUP210</i>               | chr3_13317933   | rs354477     | G | A | 0.038 | 1.000 | 0.038 | G (79%)<br>A (21%) | G (60%)<br>A (40%) | G (41%)<br>A (59%) |
|                             | chr3_13354079   | rs2280084    | C | A | 0.044 | 0.909 | 0.057 | C (66%)<br>A (34%) | C (50%)<br>A (50%) | C (32%)<br>A (68%) |
| <i>POTEJ</i>                | chr2_130656603  | rs62165276   | C | T | 0.031 | 0.382 | 0.003 | C (96%)<br>T (4%)  | C (55%)<br>T (45%) | C (53%)<br>T (47%) |
| <i>PTPRD</i>                | chr9_8341445    | rs3736381    | T | C | 0.046 | 0.613 | 0.013 | T (83%)<br>C (17%) | T (55%)<br>C (45%) | T (46%)<br>C (54%) |
| <i>RBFOX1</i>               | chr16_5239841   | rs1279779604 | G | T | 0.023 | 0.282 | 0.002 | G (100%)           | G (55%)<br>T (45%) | G (53%)<br>T (47%) |
| <i>SIRT1</i>                | chr10_67887701  | rs41299232   | C | G | 0.047 | 0.798 | 0.083 | C (96%)<br>G (4%)  | C (90%)<br>G (10%) | C (56%)<br>G (44%) |
| <i>SLC6A2</i>               | chr16_55684972  | rs2270935    | T | C | 0.043 | 0.473 | 0.185 | T (33%)<br>C (67%) | T (88%)<br>C (12%) | T (75%)<br>C (25%) |
| <i>SLC9B1</i>               | chr4_102901335  | rs3974500    | G | A | 0.023 | 0.450 | 0.123 | G (100%)           | G (100%)           | G (53%)<br>A (47%) |
| <i>TBC1D22B</i>             | chr6_37314058   | rs149705     | T | C | 0.043 | 0.761 | 0.021 | T (82%)<br>C (18%) | T (57%)<br>C (43%) | T (44%)<br>C (56%) |
| <i>TRPM2</i>                | chr21_44406920  | rs1785440    | A | G | 0.034 | 0.398 | 0.009 | A (82%)<br>G (18%) | A (50%)<br>G (50%) | A (43%)<br>G (57%) |
| <i>TSPAN3</i>               | chr15_77071109  | rs11072641   | T | C | 0.013 | 0.429 | 0.086 | T (98%)<br>C (2%)  | T (92%)<br>C (48%) | T (48%)<br>C (52%) |
